# Supplementary material for: Light enhanced cytotoxicity and antitumoral effect of a ruthenium-based photosensitizer inspired from natural alkaloids
Source: Royal Society of Chemistry journal article supplement (doi:10.1039/d4md00600c), 2024-10-25
Supplement: d4md00600c1.pdf [file d4md00600c1.pdf]

## Supporting Information

### Light Enhanced Cytotoxicity and Antitumoral Effect of a Ruthenium-Based Photosensitizer Inspired from Natural Alkaloids

Gennaro Sanità,<sup>a†</sup> Maria Laura Alfieri,<sup>b†</sup> Barbara Carrese,<sup>c</sup> Serena Damian,<sup>b</sup> Vincenza Mele,<sup>c</sup>  
Gaetano Calì,<sup>d</sup> Brigida Silvestri,<sup>e</sup> Sebastiano Marra,<sup>e</sup> Susan Mohammadi,<sup>f</sup> Giuseppina Luciani,<sup>g</sup>  
Paola Manini,<sup>b\*</sup> Annalisa Lamberti<sup>c\*</sup>

<sup>a</sup> Institute of Applied Sciences and Intelligent Systems Unit of Naples, National Research Council,  
Naples, Italy

<sup>b</sup> Department of Chemical Sciences, University of Naples Federico II, Naples, Italy

<sup>c</sup> Department of Molecular Medicine and Medical Biotechnology, University of Naples Federico  
II, Naples, Italy

<sup>d</sup> Institute of Endocrinology and Molecular Oncology, National Research Council, Naples, Italy

<sup>e</sup> Department of Civil, Architectural and Environmental Engineering, University of Naples  
Federico II, Naples, Italy

<sup>f</sup> Scuola Superiore Meridionale, Naples, Italy

<sup>g</sup> Department of Chemical, Materials and Industrial Production Engineering, University of  
Naples Federico II, Naples, Italy

|                                                                                                                              |         |
|------------------------------------------------------------------------------------------------------------------------------|---------|
| Index                                                                                                                        | S1      |
| NMR and mass spectra of compound <b>3</b>                                                                                    | S2-S4   |
| NMR and mass spectra of compound <b>1</b>                                                                                    | S5-S10  |
| UV-visible data of compound <b>3</b>                                                                                         | S11     |
| Determination of the hydrophilic/hydrophobic character of <b>1</b>                                                           | S11     |
| In vitro cytotoxicity of the ruthenium complex <b>1</b> on<br>MCf10a cell line by Cell-Titer GLO <sup>®</sup> assays         | S12-S13 |
| In vitro cytotoxicity of the ruthenium complex <b>1</b> on Hs578T and A375cell lines<br>by Cell-Titer GLO <sup>®</sup> assay | S14     |

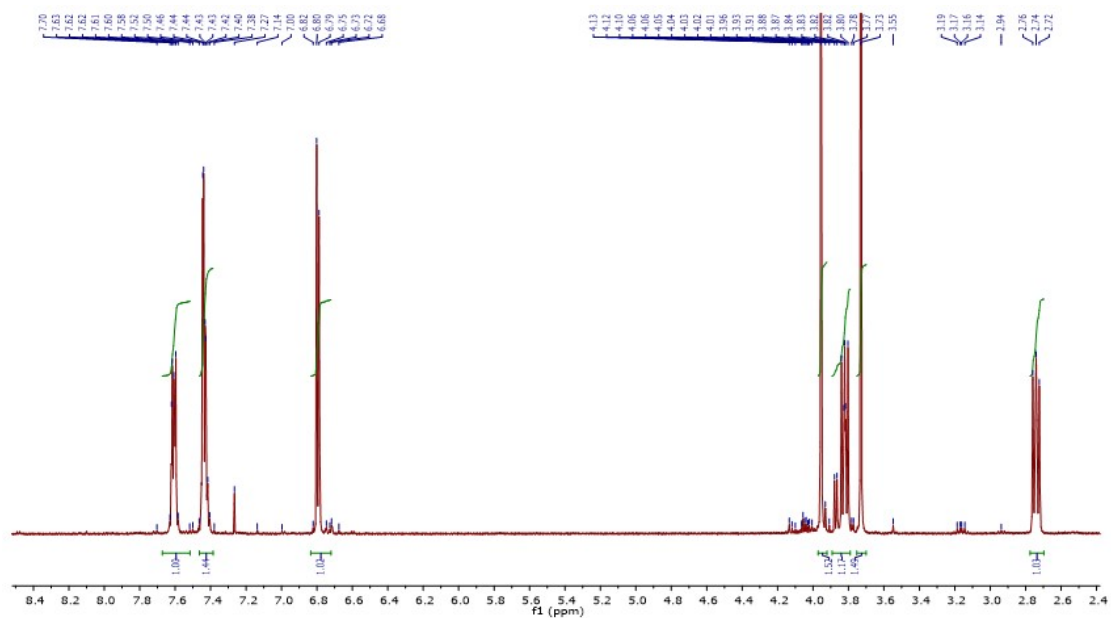

**Figure S1.** <sup>1</sup>H NMR spectrum of **3** in CDCl<sub>3</sub>.

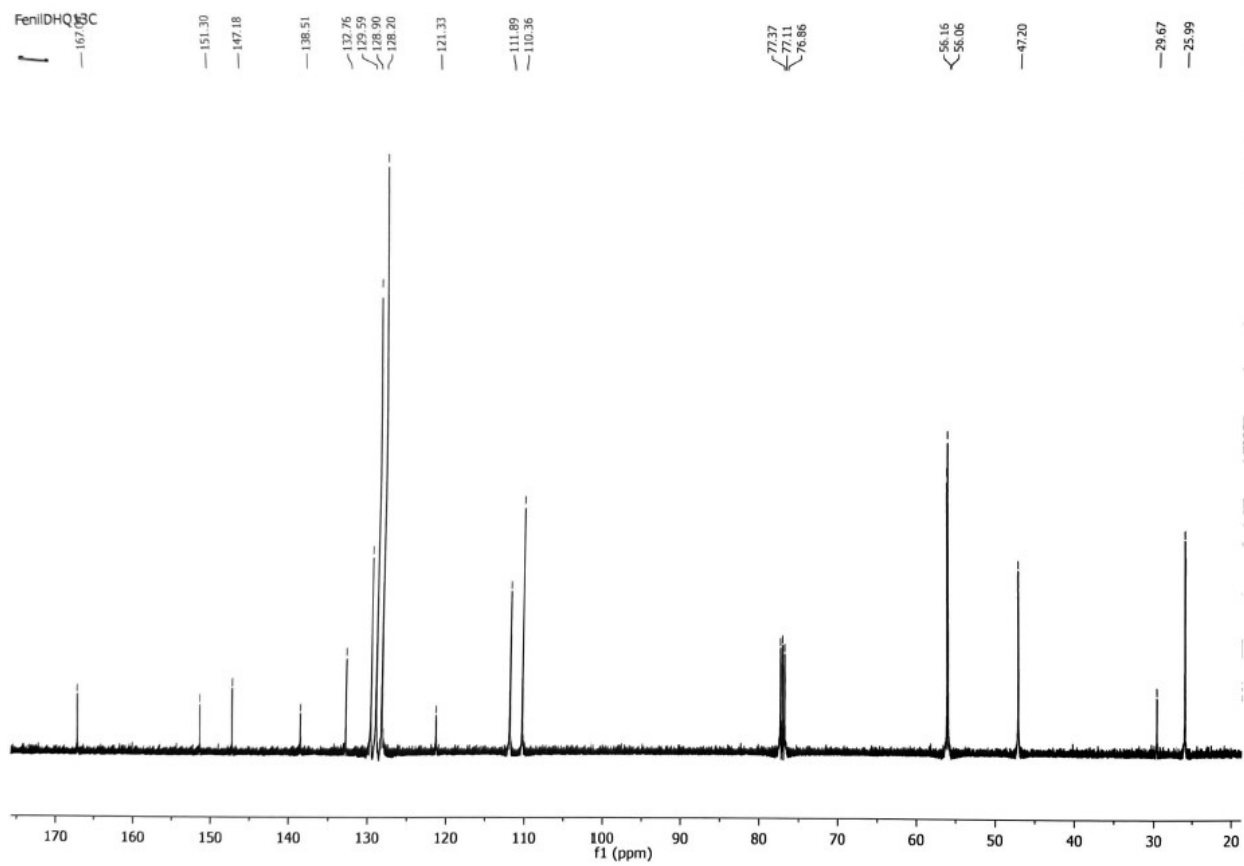

**Figure S2.**  $^{13}\text{C}$  NMR spectrum of **3** in  $\text{CDCl}_3$ .

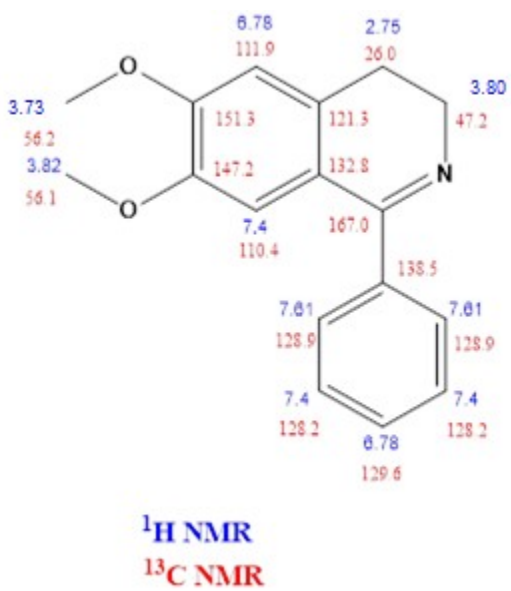

**Figure S3.**  $^1\text{H}$  and  $^{13}\text{C}$  assignments for compound **3**.

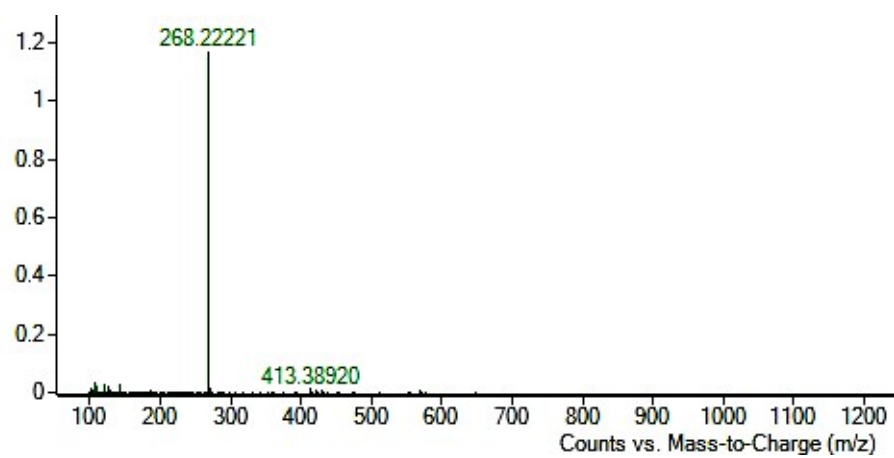

**Figure S4.** ESI<sup>+</sup>-MS spectrum of **3**.

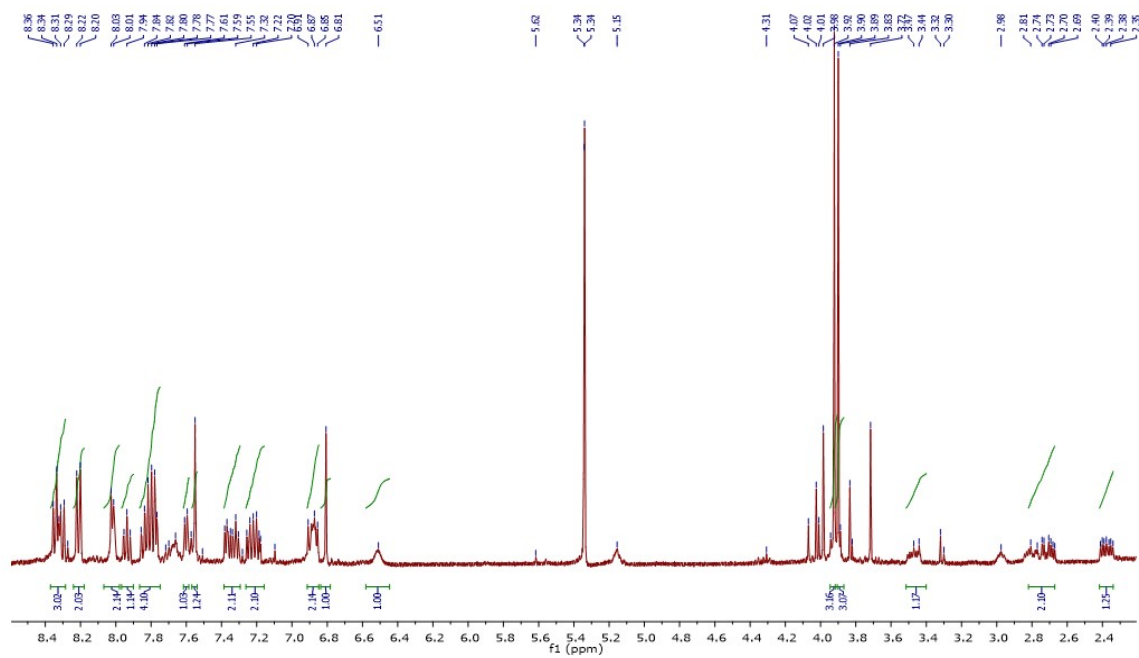

**Figure S5.** <sup>1</sup>H NMR spectrum of complex **1** in CD<sub>2</sub>Cl<sub>2</sub>

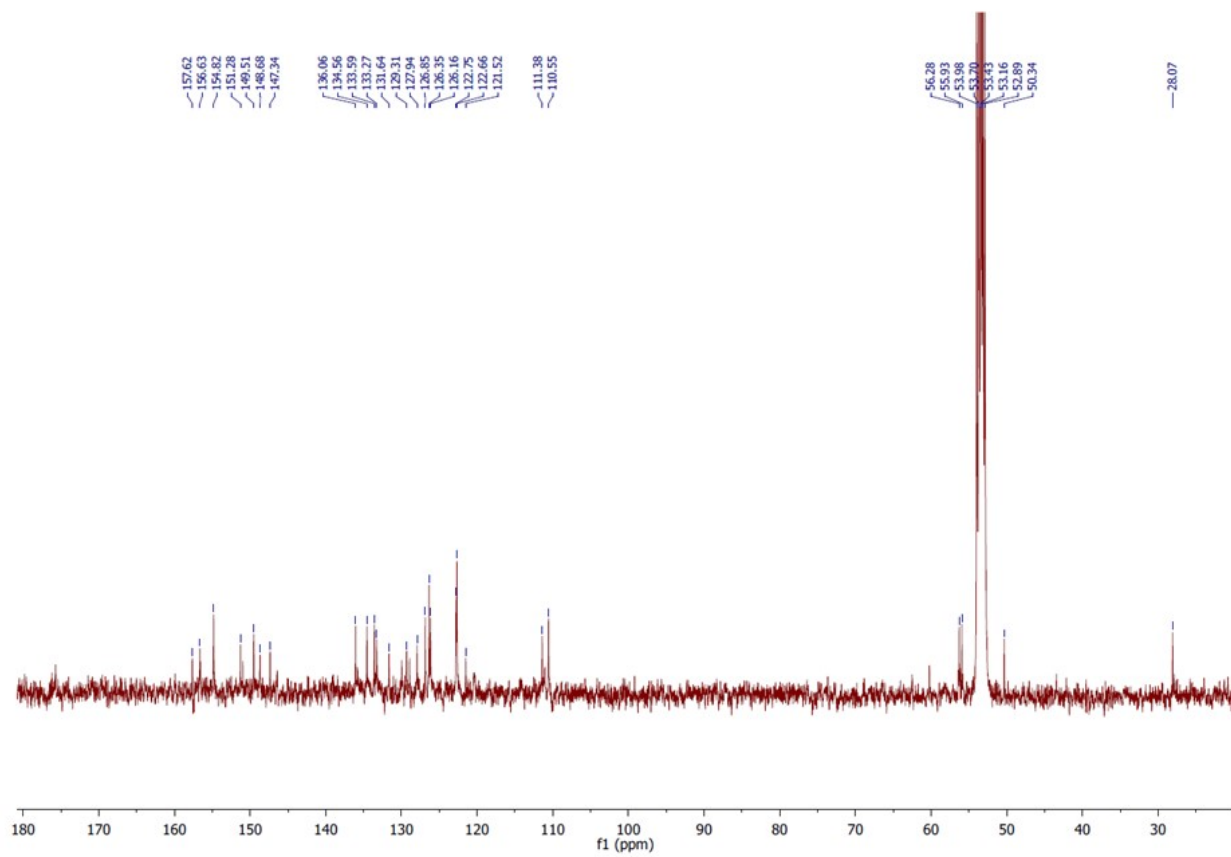

**Figure S6.** <sup>13</sup>C NMR spectrum of complex **1** in CD<sub>2</sub>Cl<sub>2</sub>.

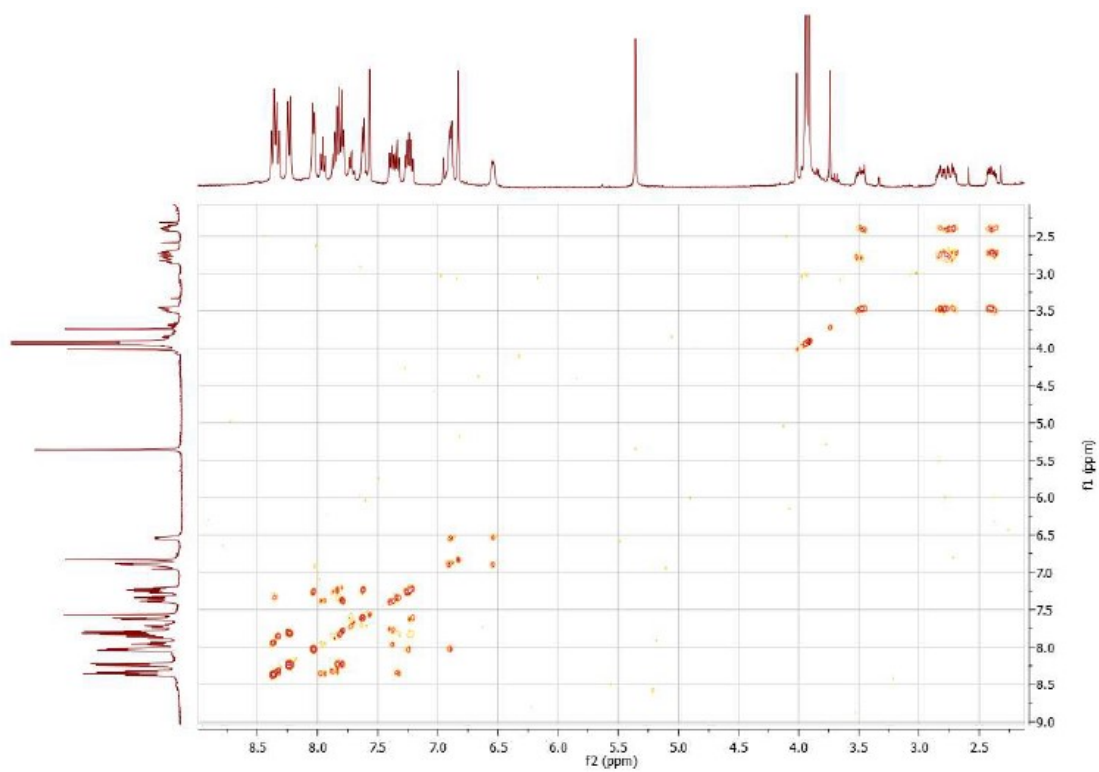

**Figure S7.**  $^1\text{H}, ^1\text{H}$  COSY spectrum of complex **1** in  $\text{CH}_2\text{Cl}_2$ .

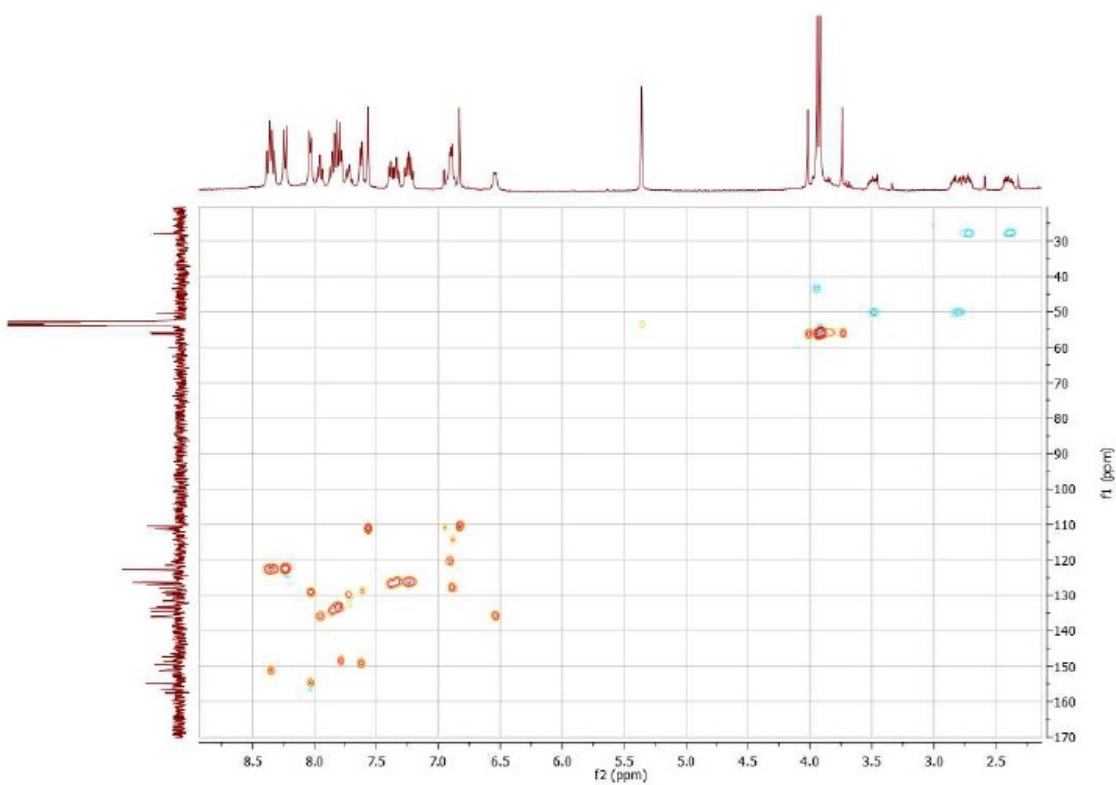

**Figure S8.**  $^1\text{H}, ^{13}\text{C}$  HSQC spectrum of complex **1** in  $\text{CH}_2\text{Cl}_2$ .

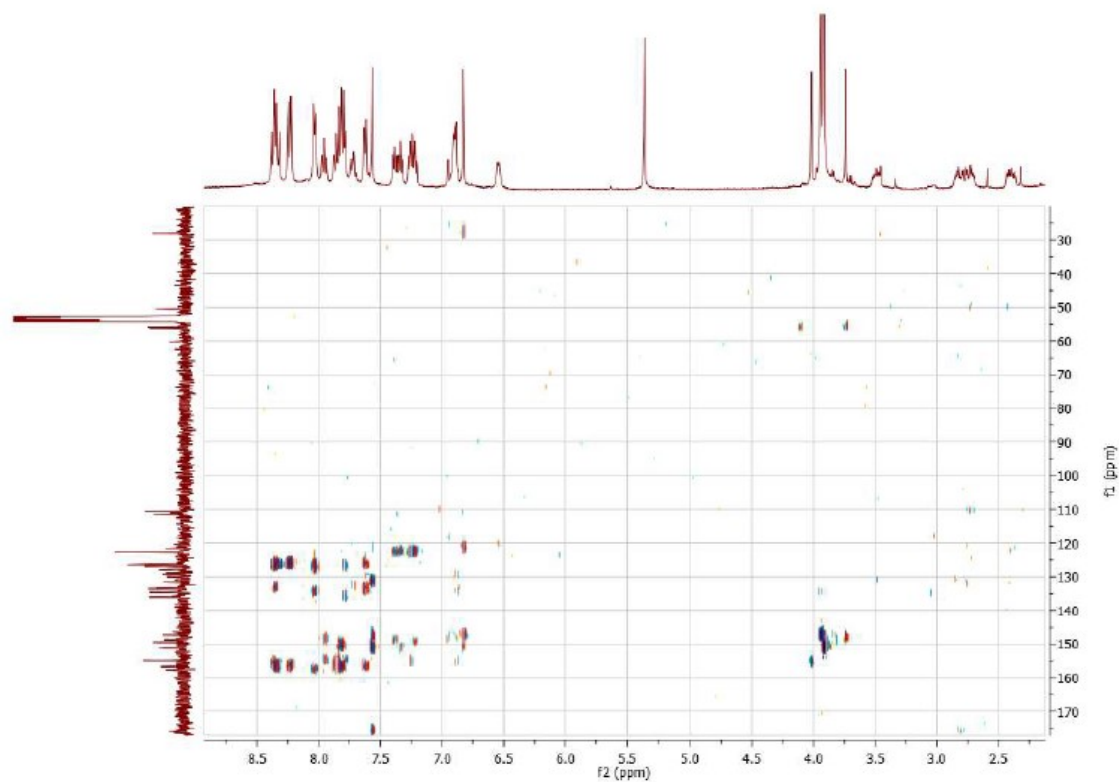

**Figure S9.**  $^1\text{H}$ ,  $^{13}\text{C}$  HMBC spectrum of complex **1** in  $\text{CH}_2\text{Cl}_2$ .

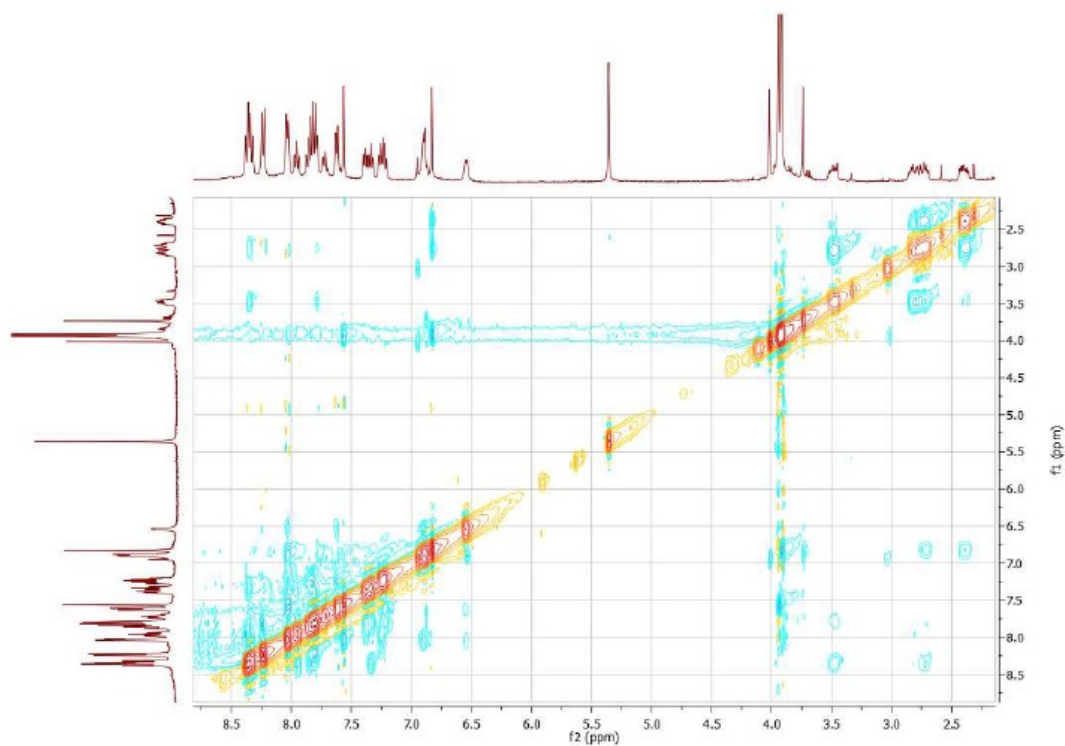

**Figure S10.** NOESY spectrum of complex **1** in  $\text{CH}_2\text{Cl}_2$ .



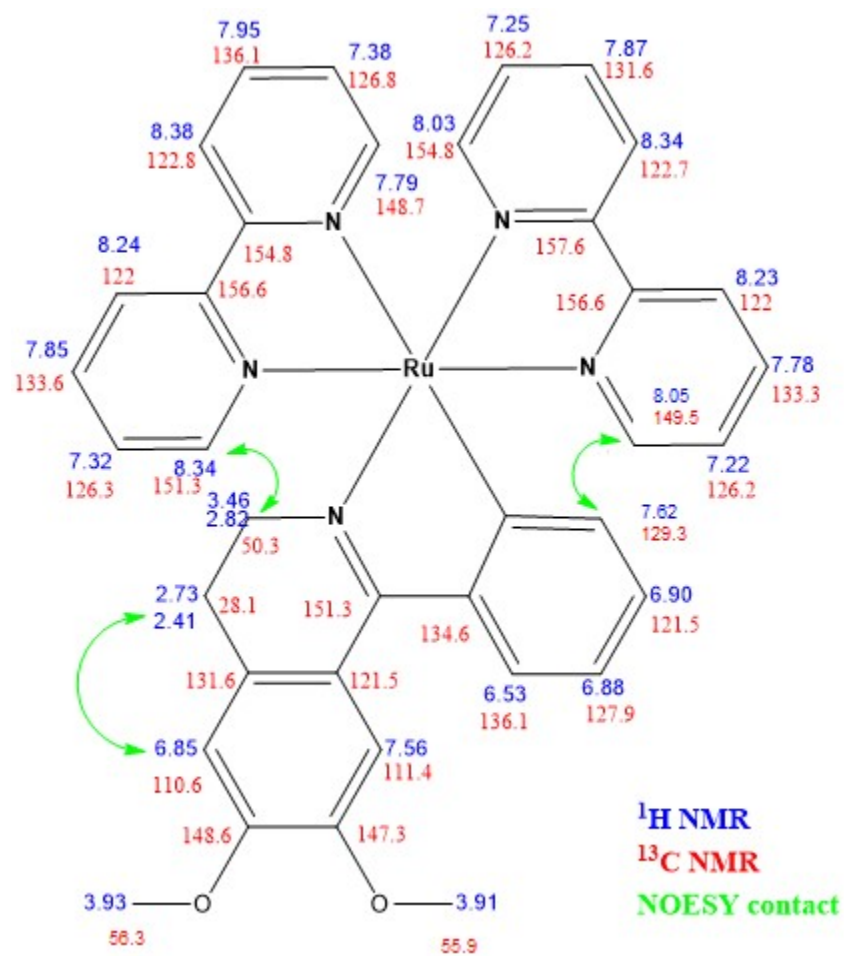

**Figure S11.** <sup>1</sup>H and <sup>13</sup>C assignments for compound 1.

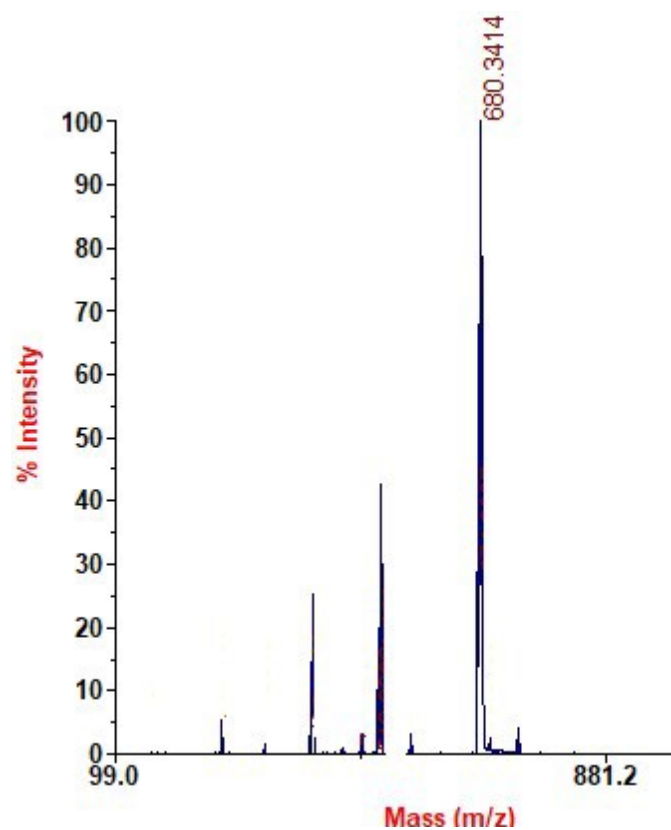

**Figure S12.** MALDI mass spectrum in the positive ion mode of complex **1**.

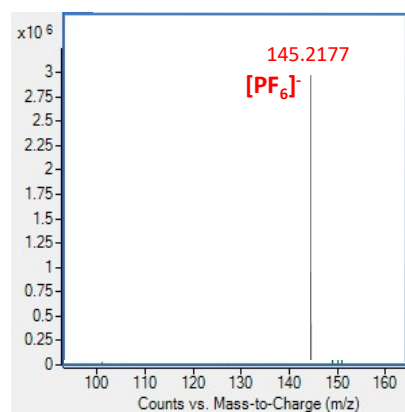

**Figure S13.** MALDI mass spectrum in the negative ion mode of complex **1**.

**Table S1.** UV-visible data of the ligand **3**.<sup>a</sup>

|                       | UV-vis $\lambda_{\text{max}}$ , nm<br>(log $\epsilon$ , M <sup>-1</sup> cm <sup>-1</sup> ) |
|-----------------------|--------------------------------------------------------------------------------------------|
| <b>3</b> <sup>b</sup> | 239 (4.19), 285<br>(3.57), 309 (3.63)                                                      |

<sup>a</sup> Determined in diluted solutions ( $1 \times 10^{-5}$  M); <sup>b</sup> determined in CHCl<sub>3</sub>.

#### **Determination of the hydrophilic/hydrophobic character of **1**.**

The partition coefficient (log*P*) for **1** was measured by a UV-vis spectroscopic approach. An aqueous solution of **1** (10 μM) was mixed with an equal volume of *n*-octanol. After shaking for 12 h at room temperature, the mixture was allowed to separate by centrifugation. The concentration of the complex **1** in each phase was determined by UV-vis spectroscopy.

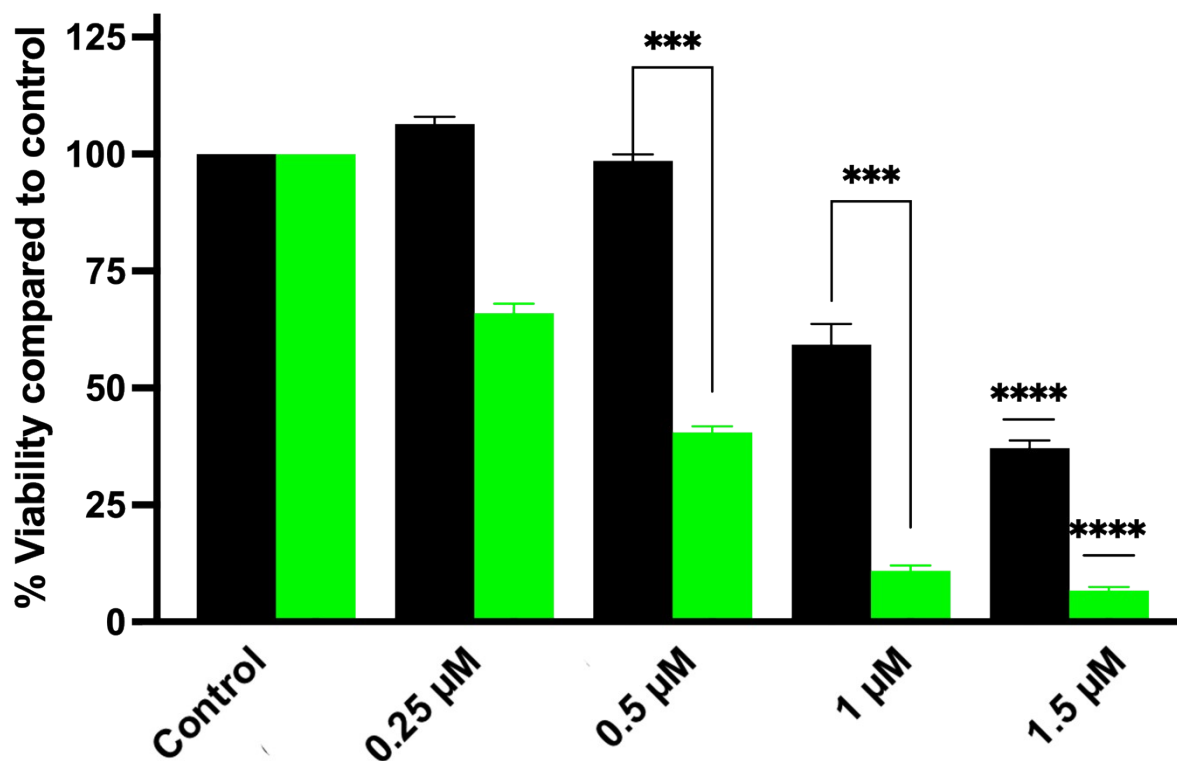

**Figure S14.** In vitro cytotoxicity of the ruthenium complex **1** on MCF10a cell line. Cell-Titer GLO<sup>®</sup> assay under dark conditions (black bars) or after light irradiation (green bars). \*\*\*\*\*  $P \leq 0.001$ ; \*\*\*  $P \leq 0.01$ .

A)

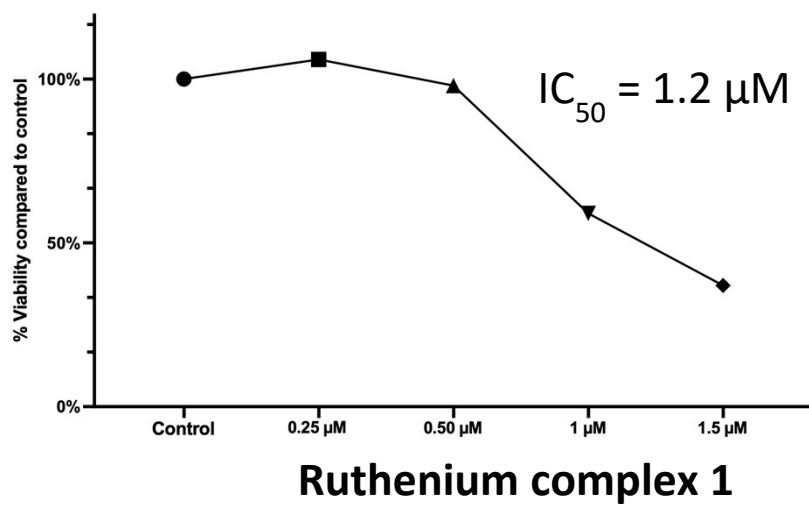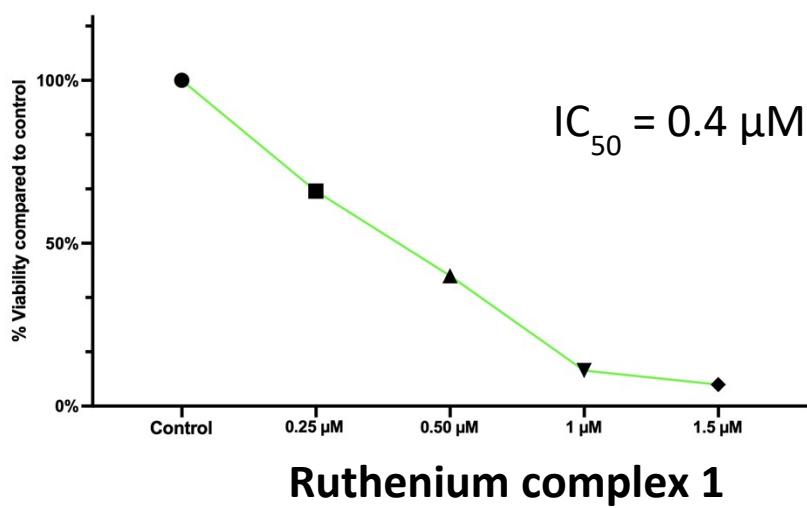

B)

**Figure S15.** In vitro cytotoxicity of the ruthenium complex 1 on MCf10a cell line. Cell-Titer GLO<sup>®</sup> assay under dark conditions (A) or after light irradiation (B).

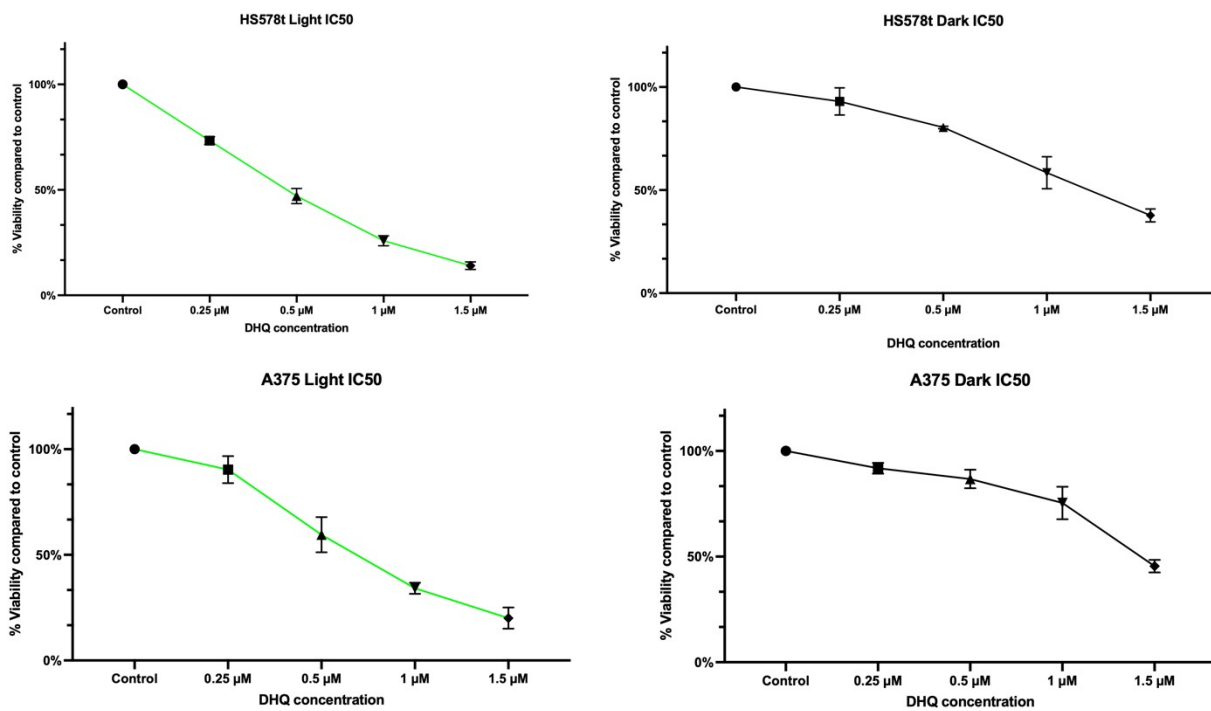

**Figure S16.** In vitro cytotoxicity of the ruthenium complex **1** on Hs578T and A375 cell lines. Cell-Titer GLO<sup>®</sup> assay under dark conditions (black traces on the right) or after light irradiation (green traces on the left).
